# Supplementary material for: Parametric Optimization for Quality of Electric Discharge Machined Profile by Using Multi-Shape Electrode
Source: MDPI journal article supplement (doi:10.3390/ma15062205), 2022-03-16
Supplement: s1 [file s1]

**Table S1. ANOVA for Accuracy of angles 30°**

| Source                                                 | DOF | Seq SS   | Adj SS   | Adj MS | F    | P%    |
|--------------------------------------------------------|-----|----------|----------|--------|------|-------|
| Current (I <sub>P</sub> )                              | 2   | 5.909    | 5.909    | 2.954  | 0.64 | 0.530 |
| Spark Voltage (V <sub>P</sub> )                        | 2   | 17.225   | 17.225   | 8.613  | 1.86 | 0.049 |
| Depth of Cut (DOC)                                     | 2   | 1.366    | 1.366    | 0.683  | 0.15 | 0.863 |
| Pulse on time (T <sub>ON</sub> )                       | 2   | 9.425    | 9.425    | 4.713  | 1.02 | 0.044 |
| Current × spark voltage                                | 4   | 4.479    | 4.479    | 1.120  | 0.24 | 0.914 |
| Current × Depth of cut                                 | 4   | 18.781   | 18.781   | 4.695  | 1.01 | 0.403 |
| Current × pulse on time                                | 4   | 5.878    | 5.878    | 1.469  | 0.32 | 0.866 |
| Spark voltage × depth of cut                           | 4   | 18.316   | 18.316   | 4.579  | 0.99 | 0.416 |
| Spark voltage × pulse on time                          | 4   | 15.092   | 15.092   | 3.773  | 0.81 | 0.518 |
| Depth of cut × pulse on time                           | 4   | 20.451   | 20.451   | 5.113  | 1.10 | 0.357 |
| Current × spark voltage × depth of cut                 | 8   | 60.926   | 60.926   | 7.616  | 1.64 | 0.117 |
| Current × spark voltage × pulse on time                | 8   | 26.746   | 26.746   | 3.343  | 0.72 | 0.673 |
| Current × depth of cut × pulse on time                 | 8   | 27.458   | 27.458   | 3.432  | 0.74 | 0.656 |
| spark voltage × depth of cut × pulse on time           | 8   | 38.783   | 38.783   | 4.848  | 1.05 | 0.404 |
| Current × spark voltage × depth of cut × pulse on time | 16  | 21.767   | 21.767   | 1.360  | 0.29 | 0.997 |
| Error                                                  | 162 | 751.286  | 751.286  | 4.638  |      |       |
| Total                                                  | 242 | 1043.889 | 1043.889 |        |      | 7.807 |

Seq, SS, sum of squares;  
DOF, Degree of freedom;  
Adj MS, Adjusted Mean square  
P, Percentage contribution;  
Significance at 95% confidence level.

**Table S2. ANOVA for Accuracy of angles 60°**

| Source                                       | DOF | Seq SS | Adj SS | Adj MS | F    | P%    |
|----------------------------------------------|-----|--------|--------|--------|------|-------|
| Current (Ip)                                 | 2   | 15.132 | 15.132 | 7.566  | 2.08 | 0.128 |
| Spark Voltage (Vp)                           | 2   | 20.894 | 20.894 | 10447  | 2.88 | 0.059 |
| Depth of Cut (DOC)                           | 2   | 4.191  | 4.191  | 2.095  | 0.58 | 0.563 |
| Pulse on time (TON)                          | 2   | 1.494  | 1.494  | 0.747  | 0.21 | 0.814 |
| Current × spark voltage                      | 4   | 63.831 | 63.831 | 15.958 | 4.40 | 0.002 |
| Current × Depth of cut                       | 4   | 20.361 | 20.361 | 5.090  | 1.40 | 0.236 |
| Current × pulse on time                      | 4   | 28.061 | 28.061 | 7.015  | 1.93 | 0.107 |
| Spark voltage × depth of cut                 | 4   | 18.797 | 18.797 | 4.699  | 1.29 | 0.274 |
| Spark voltage × pulse on time                | 4   | 7.318  | 7.318  | 1.830  | 0.50 | 0.733 |
| Depth of cut × pulse on time                 | 4   | 3.565  | 3.565  | 0.891  | 0.25 | 0.912 |
| Current × spark voltage × depth of cut       | 8   | 39.794 | 39.794 | 4.974  | 1.37 | 0.213 |
| Current × spark voltage × pulse on time      | 8   | 15.603 | 15.603 | 1.950  | 0.54 | 0.827 |
| Current × depth of cut × pulse on time       | 8   | 22.928 | 22.928 | 2.866  | 0.79 | 0.612 |
| spark voltage × depth of cut × pulse on time | 8   | 17.481 | 17.481 | 2.185  | 0.60 | 0.775 |

|                                                                 |     |         |         |       |      |       |
|-----------------------------------------------------------------|-----|---------|---------|-------|------|-------|
| Current × spark<br>voltage × depth of<br>cut × pulse on<br>time | 16  | 86.335  | 86.335  | 5.396 | 1.49 | 0.110 |
| Error                                                           | 162 | 588.017 | 588.017 | 3.630 |      |       |
| Total                                                           | 242 | 953.801 |         |       |      | 6.425 |

**Table S3. ANOVA for Accuracy of angles 90°**

| Source                                             | DOF | Seq SS  | Adj SS  | Adj MS | F    | P%    |
|----------------------------------------------------|-----|---------|---------|--------|------|-------|
| Current (Ip)                                       | 2   | 28.859  | 28.859  | 12.930 | 2.58 | 0.079 |
| Spark Voltage<br>(Vp)                              | 2   | 19.310  | 19.310  | 9.655  | 1.92 | 0.149 |
| Depth of Cut<br>(DOC)                              | 2   | 12.331  | 12.331  | 6.166  | 1.23 | 0.295 |
| Pulse on time<br>(TON)                             | 2   | 0.573   | 0.573   | 0.287  | 0.06 | 0.944 |
| Current × spark<br>voltage                         | 4   | 86.621  | 86.621  | 21.655 | 4.32 | 0.002 |
| Current × Depth<br>of cut                          | 4   | 26.649  | 26.649  | 6.662  | 1.33 | 0.262 |
| Current × pulse on<br>time                         | 4   | 31.430  | 31.430  | 7.858  | 1.57 | 0.186 |
| Spark voltage ×<br>depth of cut                    | 4   | 33.231  | 33.231  | 8.308  | 1.66 | 0.163 |
| Spark voltage ×<br>pulse on time                   | 4   | 10.483  | 10.483  | 2.621  | 0.52 | 0.719 |
| Depth of cut×<br>pulse on time                     | 4   | 26.767  | 26.767  | 6.692  | 1.33 | 0.260 |
| Current ×spark<br>voltage ×depth of<br>cut         | 8   | 156.023 | 156.023 | 19.503 | 3.89 | 0.000 |
| Current ×spark<br>voltage × pulse on<br>time       | 8   | 37.843  | 37.843  | 4.730  | 0.94 | 0.483 |
| Current × depth of<br>cut × pulse on<br>time       | 8   | 18.752  | 18.752  | 2.344  | 0.47 | 0.878 |
| spark voltage ×<br>depth of cut ×<br>pulse on time | 8   | 20.013  | 20.013  | 2.502  | 0.50 | 0.856 |

|                                                                |     |          |         |       |      |       |
|----------------------------------------------------------------|-----|----------|---------|-------|------|-------|
| Current ×spark<br>voltage × depth of<br>cut × pulse on<br>time | 16  | 56.359   | 56.359  | 3.522 | 0.70 | 0.789 |
| Error                                                          | 162 | 812.566  | 812.566 | 5.016 |      |       |
| Total                                                          | 242 | 1374.810 |         |       |      | 6.065 |

**Table S4. ANOVA for Accuracy of Inner Curvature.**

| Source                                             | DOF | Seq SS   | Adj SS   | Adj MS  | F    | P%    |
|----------------------------------------------------|-----|----------|----------|---------|------|-------|
| Current (Ip)                                       | 2   | 0.33386  | 0.33386  | 0.6693  | 3.23 | 0.049 |
| Spark Voltage<br>(Vp)                              | 2   | 0.05223  | 0.05223  | 0.02611 | 0.51 | 0.604 |
| Depth of Cut<br>(DOC)                              | 2   | 0.04038  | 0.04038  | 0.02019 | 0.39 | 0.677 |
| Pulse on time<br>(Ton)                             | 2   | 0.34219  | 0.34219  | 0.17110 | 3.31 | 0.045 |
| Current × spark<br>voltage                         | 4   | 0.08625  | 0.08625  | 0.02156 | 0.42 | 0.796 |
| Current × Depth<br>of cut                          | 4   | 0.015057 | 0.015057 | 0.00264 | 0.05 | 0.995 |
| Current × pulse on<br>time                         | 4   | 0.18868  | 0.18868  | 0.04717 | 0.91 | 0.458 |
| Spark voltage ×<br>depth of cut                    | 4   | 0.09020  | 0.09020  | 0.02255 | 0.44 | 0.782 |
| Spark voltage ×<br>pulse on time                   | 4   | 0.21897  | 0.21897  | 0.05474 | 1.06 | 0.378 |
| 0.91Depth of cut×<br>pulse on time                 | 4   | 0.25265  | 0.25265  | 0.06316 | 1.22 | 0.303 |
| Current ×spark<br>voltage ×depth of<br>cut         | 8   | 0.39395  | 0.39395  | 0.04924 | 0.95 | 0.475 |
| Current ×spark<br>voltage × pulse on<br>time       | 8   | 0.26407  | 0.26407  | 0.03301 | 0.64 | 0.744 |
| Current × depth of<br>cut × pulse on<br>time       | 8   | 0.44311  | 0.44311  | 0.0553  | 1.07 | 0.385 |
| spark voltage ×<br>depth of cut ×<br>pulse on time | 8   | 0.57352  | 0.57352  | 0.07169 | 1.39 | 0.205 |

|                                                                |     |  |  |  |  |       |
|----------------------------------------------------------------|-----|--|--|--|--|-------|
| Current ×spark<br>voltage × depth of<br>cut × pulse on<br>time | 16  |  |  |  |  | 0.388 |
| Error                                                          | 162 |  |  |  |  |       |
| Total                                                          | 242 |  |  |  |  | 7.284 |

**Table S5. ANOVA for Accuracy of Outer Curvature.**

| Source                                             | DOF | Seq SS   | Adj SS   | Adj MS  | F    | P%    |
|----------------------------------------------------|-----|----------|----------|---------|------|-------|
| Current (Ip)                                       | 2   | 0.29265  | 0.29265  | 0.14632 | 2.14 | 0.021 |
| Spark Voltage<br>(Vp)                              | 2   | 0.47427  | 0.47427  | 0.23714 | 3.46 | 0.044 |
| Depth of Cut<br>(DOC)                              | 2   | 0.00761  | 0.00761  | 0.00381 | 0.06 | 0.946 |
| Pulse on time<br>(TON)                             | 2   | 0.08601  | 0.08601  | 0.04300 | 0.63 | 0.535 |
| Current × spark<br>voltage                         | 4   | 0.02227  | 0.02227  | 0.00557 | 0.08 | 0.988 |
| Current × Depth<br>of cut                          | 4   | 0.017037 | 0.017037 | 0.4259  | 0.62 | 0.648 |
| Current × pulse on<br>time                         | 4   | 0.06182  | 0.06182  | 0.01545 | 0.23 | 0.924 |
| Spark voltage ×<br>depth of cut                    | 4   | 0.36861  | 0.36861  | 0.09215 | 1.35 | 0.256 |
| Spark voltage ×<br>pulse on time                   | 4   | 0.10844  | 0.10844  | 0.02711 | 0.40 | 0.812 |
| 0.91Depth of cut×<br>pulse on time                 | 4   | 0.16089  | 0.16089  | 0.04022 | 0.59 | 0.672 |
| Current ×spark<br>voltage ×depth of<br>cut         | 8   | 0.39705  | 0.39705  | 0.04963 | 0.72 | 0.670 |
| Current ×spark<br>voltage × pulse on<br>time       | 8   | 0.85845  | 0.85845  | 0.10656 | 1.56 | 0.142 |
| Current × depth of<br>cut × pulse on<br>time       | 8   | 0.26592  | 0.26592  | 0.03324 | 0.49 | 0.865 |
| spark voltage ×<br>depth of cut ×<br>pulse on time | 8   | 0.23308  | 0.23308  | 0.02914 | 0.43 | 0.905 |

|                                                                |     |          |          |         |      |       |
|----------------------------------------------------------------|-----|----------|----------|---------|------|-------|
| Current ×spark<br>voltage × depth of<br>cut × pulse on<br>time | 16  | 0.67061  | 0.67061  | 0.04191 | 0.61 | 0.871 |
| Error                                                          | 162 | 11.09873 | 11.09873 | 0.06851 |      |       |
| Total                                                          | 242 | 15.27077 |          |         |      |       |

**Table S6. ANOVA for Surface Roughness.**

| Source                                             | DOF | Seq SS  | Adj SS  | Adj MS | F    | P%    |
|----------------------------------------------------|-----|---------|---------|--------|------|-------|
| Current (Ip)                                       | 2   | 8.1201  | 8.1201  | 4.0600 | 4.41 | 0.014 |
| Spark Voltage<br>(Vp)                              | 2   | 1.6095  | 1.6095  | 0.8047 | 0.87 | 0.419 |
| Depth of Cut<br>(DOC)                              | 2   | 1.9503  | 1.9503  | 0.9751 | 1.06 | 0.349 |
| Pulse on time<br>(TON)                             | 2   | 6.7161  | 6.7161  | 3.3580 | 3.65 | 0.028 |
| Current × spark<br>voltage                         | 4   | 17.1065 | 17.1065 | 4.2766 | 4.65 | 0.001 |
| Current × Depth<br>of cut                          | 4   | 9.4289  | 9.4289  | 2.3572 | 2.56 | 0.041 |
| Current × pulse on<br>time                         | 4   | 1.3254  | 1.3254  | 0.3314 | 0.36 | 0.837 |
| Spark voltage ×<br>depth of cut                    | 4   | 2.3859  | 2.3859  | 0.5965 | 0.65 | 0.629 |
| Spark voltage ×<br>pulse on time                   | 4   | 0.1077  | 0.1077  | 0.0269 | 0.03 | 0.998 |
| 0.91Depth of cut×<br>pulse on time                 | 4   | 0.5137  | 0.5137  | 0.1284 | 0.14 | 0.967 |
| Current ×spark<br>voltage ×depth of<br>cut         | 8   | 5.2555  | 5.2555  | 0.6569 | 0.71 | 0.679 |
| Current ×spark<br>voltage × pulse on<br>time       | 8   | 0.7476  | 0.7476  | 0.0934 | 0.10 | 0.999 |
| Current × depth of<br>cut × pulse on<br>time       | 8   | 1.4663  | 1.4663  | 0.1833 | 0.20 | 0.991 |
| spark voltage ×<br>depth of cut ×<br>pulse on time | 8   | 0.2114  | 0.2114  | 0.0264 | 0.03 | 1.000 |

|                                                                |     |          |          |        |      |       |
|----------------------------------------------------------------|-----|----------|----------|--------|------|-------|
| Current ×spark<br>voltage × depth of<br>cut × pulse on<br>time | 16  | 0.8239   | 0.8239   | 0.0515 | 0.06 | 1.000 |
| Error                                                          | 162 | 149.1507 | 149.1507 | 0.9207 |      |       |
| Total                                                          | 242 | 206.9195 |          |        |      |       |

**Table S7. ANOVA for Hardness.**

| Source                                             | DOF | Seq SS  | Adj SS  | Adj MS  | F     | P%    |
|----------------------------------------------------|-----|---------|---------|---------|-------|-------|
| Current (Ip)                                       | 2   | 21.845  | 21.845  | 10.922  | 1.17  | 0.314 |
| Spark Voltage<br>(Vp)                              | 2   | 43.070  | 43.070  | 21.535  | 2.30  | 0.104 |
| Depth of Cut<br>(DOC)                              | 2   | 115.515 | 115.515 | 57.758  | 6.17  | 0.003 |
| Pulse on time<br>(Ton)                             | 2   | 546.351 | 546.351 | 273.176 | 29.16 | 0.000 |
| Current × spark<br>voltage                         | 4   | 29.802  | 29.802  | 7.451   | 0.80  | 0.530 |
| Current × Depth<br>of cut                          | 4   | 90.007  | 90.007  | 22.502  | 2.40  | 0.052 |
| Current × pulse on<br>time                         | 4   | 2.959   | 2.959   | 0.740   | 0.08  | 0.989 |
| Spark voltage ×<br>depth of cut                    | 4   | 39.929  | 39.929  | 9.982   | 1.07  | 0.375 |
| Spark voltage ×<br>pulse on time                   | 4   | 7.777   | 7.777   | 1.944   | 0.21  | 0.934 |
| 0.91Depth of cut×<br>pulse on time                 | 4   | 20.842  | 20.842  | 5.211   | 0.56  | 0.695 |
| Current ×spark<br>voltage ×depth of<br>cut         | 8   | 50.967  | 50.967  | 6.371   | 0.68  | 0.709 |
| Current ×spark<br>voltage × pulse on<br>time       | 8   | 33.935  | 33.935  | 4.242   | 0.45  | 0.887 |
| Current × depth of<br>cut × pulse on<br>time       | 8   | 15.778  | 15.778  | 1.972   | 0.21  | 0.989 |
| spark voltage ×<br>depth of cut ×<br>pulse on time | 8   | 11.910  | 11.910  | 1.489   | 0.16  | 0.996 |

|                                                                 |     |          |          |       |      |       |
|-----------------------------------------------------------------|-----|----------|----------|-------|------|-------|
| Current × spark<br>voltage × depth of<br>cut × pulse on<br>time | 16  | 23.582   | 23.582   | 1.474 | 0.16 | 1.000 |
| Error                                                           | 162 | 1517.673 | 1517.673 | 9.368 |      |       |
| Total                                                           | 242 | 2571.940 |          |       |      |       |

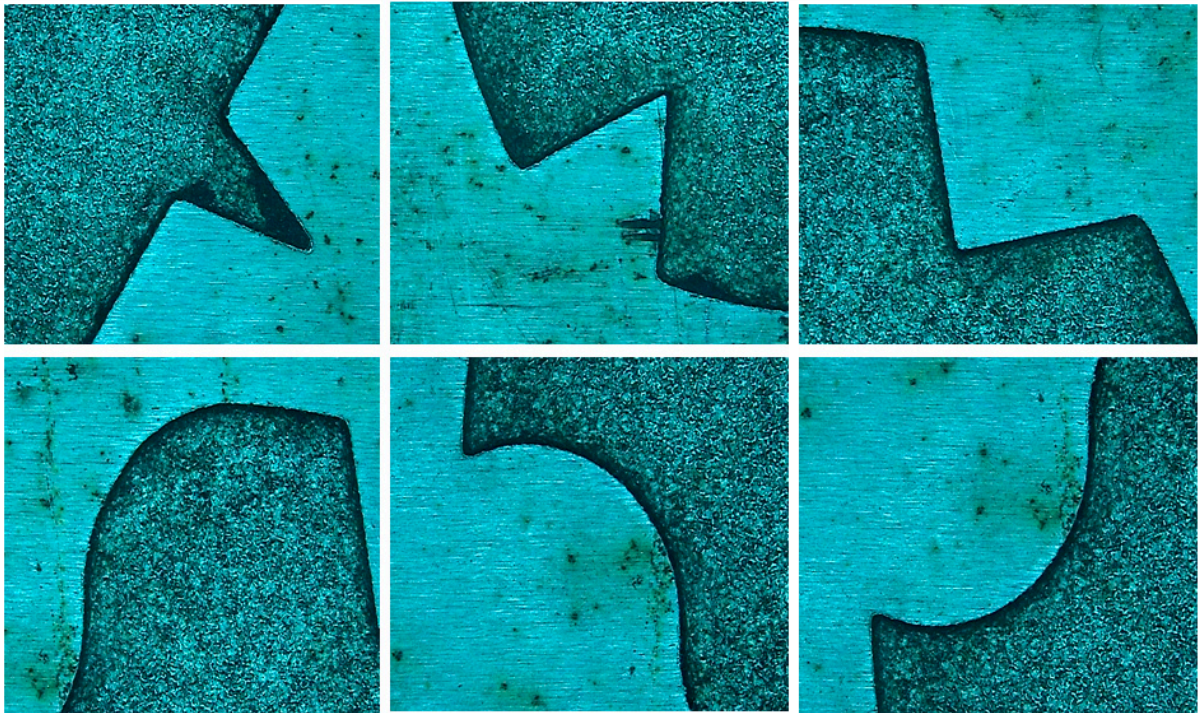

**Figure S1.** CMM images of the machined profile at angles and curvatures for the observance of Accuracy.
